# Supplementary material for: Establishment and Characterisation by Expression Microarray of Patient-Derived Xenograft Panel of Human Pancreatic Adenocarcinoma Patients
Source: Int J Mol Sci. 2020 Jan 31;21(3):962. doi: 10.3390/ijms21030962 (PMC7037178; doi:10.3390/ijms21030962)
Supplement: Supplementary file 1 [file ijms-21-00962-s001.zip]

Archive with 4 entries (4 files):
- Supplementary Table S3.xlsx
- Supp Fig S1&S2.pdf
- Supplementary Table S2.docx
- Supplementary Table S1.xlsx
