# Supplementary material for: Establishment and Characterisation by Expression Microarray of Patient-Derived Xenograft Panel of Human Pancreatic Adenocarcinoma Patients
Source: Int J Mol Sci. 2020 Jan 31;21(3):962. doi: 10.3390/ijms21030962 (PMC7037178; doi:10.3390/ijms21030962)
Supplement: Supplementary file 1 [file ijms-21-00962-s001.zip › Supplementary Table S1.xlsx]

## Sheet: Shortlist of 
Affy ID	tumour Avg (log2)	normal Avg (log2)	tumour Standard Deviation	normal Standard Deviation	Fold Change	P-val	FDR P-val	Overall F-Test	Overall FDR F-Test	Gene Symbol	Description	Entrez ID	ID	F1 Avg (log2)	tumour Avg (log2)	F1 Standard Deviation	tumour Standard Deviation	Fold Change	P-val	FDR P-val	Overall F-Test	Overall FDR F-Test	Gene Symbol	Description	Entrez ID
16907979	3.74	2.73	0.95	0.3	2.01	0.0271	0.3616	6.33e-07	7.89e-05	ABCA12	ATP binding cassette subfamily A member 12	26154	16907979	6.25	3.74	1.06	0.95	5.67	2.34e-05	0.0015	6.33e-07	7.89e-05	ABCA12	ATP binding cassette subfamily A member 12	26154
16803743	6.48	4.77	1.08	0.41	3.27	0.0002	0.0702	3.08e-07	5.13e-05	ABHD17C	abhydrolase domain containing 17C	58489	16803743	7.88	6.48	0.48	1.08	2.63	0.001	0.0201	3.08e-07	5.13e-05	ABHD17C	abhydrolase domain containing 17C	58489
17019778	6.12	4.41	1.35	0.98	3.26	0.0053	0.2326	2.63e-05	0.001	ADGRF1	adhesion G protein-coupled receptor F1	266977	17019778	7.75	6.12	0.91	1.35	3.1	0.0058	0.0642	2.63e-05	0.001	ADGRF1	adhesion G protein-coupled receptor F1	266977
16964835	5.1	3.03	1.54	1.04	4.19	0.0313	0.3821	0.0004	0.0076	AFAP1-AS1	AFAP1 antisense RNA 1	84740	16964835	7.27	5.1	1.53	1.54	4.51	0.0159	0.1209	0.0004	0.0076	AFAP1-AS1	AFAP1 antisense RNA 1	84740
17055501	5.73	3.42	1.42	1.25	4.98	0.0015	0.1559	7.01e-07	8.36e-05	AGR2	anterior gradient 2, protein disulphide isomerase family member	10551	17055501	8.08	5.73	0.6	1.42	5.09	0.0003	0.01	7.01e-07	8.36e-05	AGR2	anterior gradient 2, protein disulphide isomerase family member	10551
16797196	6.56	5.16	0.44	0.67	2.64	3.53e-05	0.0341	3.54e-07	5.55e-05	AHNAK2	AHNAK nucleoprotein 2	113146	16797196	7.57	6.56	0.6	0.44	2.01	0.0079	0.0785	3.54e-07	5.55e-05	AHNAK2	AHNAK nucleoprotein 2	113146
17045198	5.69	4.26	0.92	1.03	2.69	0.0035	0.2107	1.49e-07	3.08e-05	ANLN	anillin actin binding protein	54443	17045198	7.88	5.69	0.45	0.92	4.57	2.66e-05	0.0017	1.49e-07	3.08e-05	ANLN	anillin actin binding protein	54443
16749423	6.35	4.97	1.08	1.1	2.61	0.0125	0.2923	3.93e-05	0.0014	ARNTL2	aryl hydrocarbon receptor nuclear translocator-like 2	56938	16749423	7.46	6.35	0.67	1.08	2.17	0.0037	0.0479	3.93e-05	0.0014	ARNTL2	aryl hydrocarbon receptor nuclear translocator-like 2	56938
16697544	4.1	3.01	0.83	0.69	2.13	0.0091	0.2669	5.35e-09	3.49e-06	ASPM	abnormal spindle microtubule assembly	259266	16697544	6.46	4.1	0.45	0.83	5.12	2.92e-07	6.8e-05	5.35e-09	3.49e-06	ASPM	abnormal spindle microtubule assembly	259266
16859643	6.37	4.91	1	1.08	2.75	0.0061	0.2416	0.0002	0.0047	B3GNT3	UDP-GlcNAc:betaGal beta-1,3-N-acetylglucosaminyltransferase 3	10331	16859643	7.39	6.37	0.61	1	2.02	0.0432	0.2203	0.0002	0.0047	B3GNT3	UDP-GlcNAc:betaGal beta-1,3-N-acetylglucosaminyltransferase 3	10331
16920475	7.09	5.33	1.03	0.66	3.38	0.0009	0.1315	2.32e-07	4.22e-05	BCAS1	breast carcinoma amplified sequence 1	8537	16920475	8.44	7.09	0.66	1.03	2.56	0.0002	0.0057	2.32e-07	4.22e-05	BCAS1	breast carcinoma amplified sequence 1	8537
16775324	4.21	3.13	0.3	0.68	2.11	0.0045	0.2257	3.17e-07	5.2e-05	BORA	bora, aurora kinase A activator	79866	16775324	5.96	4.21	0.72	0.3	3.37	5.15e-05	0.0027	3.17e-07	5.2e-05	BORA	bora, aurora kinase A activator	79866
16901755	3.9	2.66	0.86	0.65	2.37	0.0182	0.3237	4.09e-06	0.0003	BUB1	BUB1 mitotic checkpoint serine/threonine kinase	699	16901755	5.39	3.9	0.65	0.86	2.8	0.0002	0.0079	4.09e-06	0.0003	BUB1	BUB1 mitotic checkpoint serine/threonine kinase	699
16861641	8.22	6.13	0.63	1.36	4.25	0.0165	0.3149	1.43e-05	0.0007	C19orf33	chromosome 19 open reading frame 33	64073	16861641	9.88	8.22	1.18	0.63	3.17	0.001	0.0204	1.43e-05	0.0007	C19orf33	chromosome 19 open reading frame 33	64073
16698756	6.77	5.46	0.64	0.67	2.49	4.76e-05	0.0407	2.06e-08	8.62e-06	C1orf116	chromosome 1 open reading frame 116	79098	16698756	7.99	6.77	0.44	0.64	2.32	0.0001	0.005	2.06e-08	8.62e-06	C1orf116	chromosome 1 open reading frame 116	79098
16729336	7.38	6.31	0.55	0.45	2.11	0.0089	0.2647	4.65e-05	0.0016	CAPN5	calpain 5	726	16729336	8.51	7.38	0.67	0.55	2.18	0.0062	0.0673	4.65e-05	0.0016	CAPN5	calpain 5	726
16863063	4.48	3.44	1.21	0.52	2.05	0.0233	0.3459	0.001	0.0139	CBLC	Cbl proto-oncogene C, E3 ubiquitin protein ligase	23624	16863063	5.74	4.48	0.95	1.21	2.39	0.0479	0.233	0.001	0.0139	CBLC	Cbl proto-oncogene C, E3 ubiquitin protein ligase	23624
16979515	5.65	3.98	0.8	1.12	3.19	0.0147	0.3039	7.6e-07	8.89e-05	CCNA2	cyclin A2	890	16979515	7.6	5.65	0.65	0.8	3.87	4.81e-05	0.0026	7.6e-07	8.89e-05	CCNA2	cyclin A2	890
16887840	4.89	3.37	1.44	0.55	2.87	0.0214	0.3399	0.0005	0.0087	CDCA7	cell division cycle associated 7	83879	16887840	5.91	4.89	0.84	1.44	2.02	0.0282	0.1711	0.0005	0.0087	CDCA7	cell division cycle associated 7	83879
16705159	4.03	3.03	0.65	0.81	2.01	0.0057	0.238	3.02e-06	0.0002	CDK1	cyclin-dependent kinase 1	983	16705159	5.96	4.03	0.77	0.65	3.79	0.0005	0.0133	3.02e-06	0.0002	CDK1	cyclin-dependent kinase 1	983
16978568	4.34	3.22	1.01	0.82	2.17	0.0406	0.4184	1.04e-05	0.0005	CENPE	centromere protein E	1062	16978568	6.02	4.34	0.71	1.01	3.2	0.0003	0.0093	1.04e-05	0.0005	CENPE	centromere protein E	1062
16677425	4.94	3.62	0.56	0.72	2.5	0.0007	0.1178	1.36e-09	1.23e-06	CENPF	centromere protein F	1063	16677425	6.77	4.94	0.32	0.56	3.57	3.7e-07	8.19e-05	1.36e-09	1.23e-06	CENPF	centromere protein F	1063
17096457	5.44	3.79	0.91	0.89	3.14	0.0011	0.1431	5e-06	0.0003	CORO2A	coronin, actin binding protein, 2A	7464	17096457	6.8	5.44	0.83	0.91	2.55	0.0044	0.054	5e-06	0.0003	CORO2A	coronin, actin binding protein, 2A	7464
16948021	6.31	4.94	1.15	1	2.58	0.0263	0.3598	1.2e-05	0.0006	ECT2	epithelial cell transforming 2	1894	16948021	7.76	6.31	0.34	1.15	2.74	0.0005	0.0136	1.2e-05	0.0006	ECT2	epithelial cell transforming 2	1894
16825120	6.78	5.03	1.05	1.13	3.37	0.002	0.1715	1.02e-05	0.0005	ERN2	endoplasmic reticulum to nucleus signaling 2	10595	16825120	7.86	6.78	0.48	1.05	2.11	0.0055	0.0623	1.02e-05	0.0005	ERN2	endoplasmic reticulum to nucleus signaling 2	10595
16725041	4.65	3.41	1.37	0.65	2.35	0.0372	0.4055	6.87e-06	0.0004	FAM111B	family with sequence similarity 111, member B	374393	16725041	6.59	4.65	0.97	1.37	3.84	0.0002	0.0073	6.87e-06	0.0004	FAM111B	family with sequence similarity 111, member B	374393
17009760	6.82	4.66	1.22	1.29	4.46	0.0005	0.1066	1.64e-06	0.0002	FAM83B	family with sequence similarity 83, member B	222584	17009760	8.39	6.82	0.56	1.22	2.98	0.0026	0.0386	1.64e-06	0.0002	FAM83B	family with sequence similarity 83, member B	222584
16804559	4.8	3.76	0.88	0.66	2.05	0.0109	0.2823	3.13e-07	5.19e-05	FANCI	Fanconi anemia complementation group I	55215	16804559	6.69	4.8	0.57	0.88	3.72	2.36e-05	0.0015	3.13e-07	5.19e-05	FANCI	Fanconi anemia complementation group I	55215
16917061	7.6	4.93	1.09	0.92	6.36	0.0003	0.0887	1.93e-06	0.0002	FERMT1	fermitin family member 1	55612	16917061	8.9	7.6	0.83	1.09	2.47	0.0054	0.0618	1.93e-06	0.0002	FERMT1	fermitin family member 1	55612
16863864	5.14	4.01	0.67	0.73	2.19	0.0225	0.3437	1.1e-05	0.0006	FUT2	fucosyltransferase 2 (secretor status included)	2524	16863864	6.99	5.14	0.98	0.67	3.61	0.0006	0.014	1.1e-05	0.0006	FUT2	fucosyltransferase 2 (secretor status included)	2524
16867572	4.94	3.49	0.84	0.79	2.72	0.0017	0.1606	2.9e-06	0.0002	FUT3	fucosyltransferase 3 (galactoside 3(4)-L-fucosyltransferase, Lewis blood group)	2525	16867572	6.17	4.94	0.55	0.84	2.35	0.0016	0.0273	2.9e-06	0.0002	FUT3	fucosyltransferase 3 (galactoside 3(4)-L-fucosyltransferase, Lewis blood group)	2525
16860888	5.98	3.95	0.55	1	4.06	7.64e-05	0.0504	7.41e-08	1.95e-05	FXYD3	FXYD domain containing ion transport regulator 3	5349	16860888	7.29	5.98	0.52	0.55	2.48	0.0004	0.0117	7.41e-08	1.95e-05	FXYD3	FXYD domain containing ion transport regulator 3	5349
16886717	6.49	3.95	1.68	1.15	5.82	0.0389	0.4114	0.0015	0.0183	GALNT5	polypeptide N-acetylgalactosaminyltransferase 5	11227	16886717	8.97	6.49	2.08	1.68	5.58	0.0414	0.2148	0.0015	0.0183	GALNT5	polypeptide N-acetylgalactosaminyltransferase 5	11227
16748529	7.84	6.48	1.1	1.33	2.56	0.0431	0.4251	0.0014	0.0175	GPRC5A	G protein-coupled receptor, class C, group 5, member A	9052	16748529	9.34	7.84	0.69	1.1	2.83	0.0352	0.1951	0.0014	0.0175	GPRC5A	G protein-coupled receptor, class C, group 5, member A	9052
16732755	4.59	3.43	0.65	0.63	2.23	0.0354	0.3977	0.0001	0.003	GRAMD1B	GRAM domain containing 1B	57476	16732755	5.66	4.59	0.82	0.65	2.1	0.0041	0.051	0.0001	0.003	GRAMD1B	GRAM domain containing 1B	57476
16707695	4.57	3.1	0.71	0.73	2.77	0.0046	0.2274	1.31e-05	0.0006	HELLS	helicase, lymphoid-specific	3070	16707695	5.8	4.57	0.73	0.71	2.34	0.0031	0.0429	1.31e-05	0.0006	HELLS	helicase, lymphoid-specific	3070
17005858	5.2	3.13	1.41	1.11	4.19	0.0018	0.1633	7.19e-06	0.0004	HIST1H2AI	histone cluster 1, H2ai	8329	17005858	6.97	5.2	0.97	1.41	3.42	0.0042	0.0517	7.19e-06	0.0004	HIST1H2AI	histone cluster 1, H2ai	8329
17005865	6.2	3.52	1.28	1.73	6.42	0.0061	0.2419	0.0001	0.0032	HIST1H2BM	histone cluster 1, H2bm	8342	17005865	8.05	6.2	0.65	1.28	3.6	0.025	0.1586	0.0001	0.0032	HIST1H2BM	histone cluster 1, H2bm	8342
16694617	4.42	3.42	0.77	0.5	2	0.0056	0.2358	5.27e-06	0.0003	IQGAP3	IQ motif containing GTPase activating protein 3	128239	16694617	5.51	4.42	0.53	0.77	2.12	0.001	0.02	5.27e-06	0.0003	IQGAP3	IQ motif containing GTPase activating protein 3	128239
16835672	7.72	6.2	0.7	0.71	2.86	0.0007	0.1198	2.62e-05	0.001	ITGA3	integrin alpha 3	3675	16835672	8.78	7.72	0.78	0.7	2.09	0.0453	0.2252	2.62e-05	0.001	ITGA3	integrin alpha 3	3675
16957170	4.83	3.68	0.65	0.95	2.22	0.0273	0.3634	6.2e-05	0.0019	KIAA1524	KIAA1524	57650	16957170	5.89	4.83	0.41	0.65	2.09	0.0028	0.0396	6.2e-05	0.0019	KIAA1524	KIAA1524	57650
16707468	4.96	3.7	0.77	0.75	2.39	0.0133	0.298	4.38e-07	6.35e-05	KIF11	kinesin family member 11	3832	16707468	6.78	4.96	0.62	0.77	3.53	2.87e-05	0.0018	4.38e-07	6.35e-05	KIF11	kinesin family member 11	3832
16775364	7.56	6.24	0.81	0.87	2.49	0.0117	0.2881	5.88e-06	0.0004	KLF5	Kruppel-like factor 5 (intestinal)	688	16775364	8.74	7.56	0.54	0.81	2.27	0.0005	0.0136	5.88e-06	0.0004	KLF5	Kruppel-like factor 5 (intestinal)	688
16844509	7.5	5.34	0.57	1.27	4.48	8.8e-05	0.052	1.63e-06	0.0002	KRT23	keratin 23, type I	25984	16844509	8.55	7.5	0.69	0.57	2.08	0.0189	0.1349	1.63e-06	0.0002	KRT23	keratin 23, type I	25984
16851486	6.23	5.15	1.02	0.55	2.11	0.0193	0.3294	3.92e-05	0.0014	LAMA3	laminin, alpha 3	3909	16851486	7.47	6.23	0.63	1.02	2.36	0.0024	0.0366	3.92e-05	0.0014	LAMA3	laminin, alpha 3	3909
16698489	4.1	2.76	1.2	0.16	2.53	0.0038	0.2153	5.35e-05	0.0017	LEMD1; BLACAT1	LEM domain containing 1; bladder cancer associated transcript 1 (non-protein coding)	93273; 101669762	16698489	5.34	4.1	0.77	1.2	2.37	0.0169	0.1256	5.35e-05	0.0017	LEMD1; BLACAT1	LEM domain containing 1; bladder cancer associated transcript 1 (non-protein coding)	93273; 101669762
16784381	5.44	4.39	0.7	1.12	2.07	0.01	0.2788	0.0001	0.0032	LGALS3	lectin, galactoside-binding, soluble, 3	3958	16784381	6.96	5.44	0.79	0.7	2.88	0.0153	0.1182	0.0001	0.0032	LGALS3	lectin, galactoside-binding, soluble, 3	3958
16672489	5.44	4.01	0.98	0.9	2.68	0.0037	0.2128	2.16e-06	0.0002	LINC01133	long intergenic non-protein coding RNA 1133	100505633	16672489	7.13	5.44	0.66	0.98	3.24	0.0005	0.0137	2.16e-06	0.0002	LINC01133	long intergenic non-protein coding RNA 1133	100505633
16962316	8.13	5.85	1.13	1.27	4.87	0.0003	0.0902	3.32e-06	0.0003	LIPH	lipase, member H	200879	16962316	9.35	8.13	0.71	1.13	2.33	0.0098	0.0896	3.32e-06	0.0003	LIPH	lipase, member H	200879
16775434	6.81	5.64	0.61	0.71	2.25	0.0017	0.1595	1.06e-05	0.0006	LMO7	LIM domain 7	4008	16775434	7.93	6.81	0.48	0.61	2.17	0.0069	0.0719	1.06e-05	0.0006	LMO7	LIM domain 7	4008
17072125	7.4	6.01	0.72	0.79	2.61	0.0002	0.0702	1.84e-07	3.61e-05	MAL2	mal, T-cell differentiation protein 2 (gene/pseudogene)	114569	17072125	9.04	7.4	0.51	0.72	3.13	0.0005	0.0132	1.84e-07	3.61e-05	MAL2	mal, T-cell differentiation protein 2 (gene/pseudogene)	114569
17050591	7.8	6.47	0.98	0.98	2.52	0.0049	0.2274	1.94e-05	0.0008	MET	MET proto-oncogene, receptor tyrosine kinase	4233	17050591	8.87	7.8	0.39	0.98	2.1	0.0045	0.0543	1.94e-05	0.0008	MET	MET proto-oncogene, receptor tyrosine kinase	4233
16719515	5.91	4.33	0.79	1.08	3	0.0096	0.2727	1.19e-06	0.0001	MKI67	marker of proliferation Ki-67	4288	16719515	7.72	5.91	0.49	0.79	3.5	0.0001	0.0047	1.19e-06	0.0001	MKI67	marker of proliferation Ki-67	4288
16814366	5.94	4.67	0.91	0.46	2.41	0.0138	0.2997	0.0003	0.0058	MSLN	mesothelin	10232	16814366	7.14	5.94	1.28	0.91	2.28	0.0253	0.1598	0.0003	0.0058	MSLN	mesothelin	10232
16958382	8.87	5.64	1.55	1.71	9.35	0.0007	0.1167	1.72e-05	0.0008	MUC13	mucin 13, cell surface associated	56667	16958382	10.43	8.87	0.93	1.55	2.96	0.031	0.1805	1.72e-05	0.0008	MUC13	mucin 13, cell surface associated	56667
16864427	6.16	5.01	0.37	0.51	2.23	0.0004	0.0951	4.5e-08	1.46e-05	MYH14	myosin, heavy chain 14, non-muscle	79784	16864427	7.31	6.16	0.55	0.37	2.22	4.04e-05	0.0022	4.5e-08	1.46e-05	MYH14	myosin, heavy chain 14, non-muscle	79784
16965346	5.15	4.14	0.63	1.32	2.01	0.0309	0.3804	1.01e-05	0.0005	NCAPG	non-SMC condensin I complex subunit G	64151	16965346	6.79	5.15	0.59	0.63	3.12	0.0004	0.0109	1.01e-05	0.0005	NCAPG	non-SMC condensin I complex subunit G	64151
16827679	7.94	5.25	1.04	1.56	6.44	8.45e-05	0.052	5.56e-07	7.45e-05	NQO1	NAD(P)H dehydrogenase, quinone 1	1728	16827679	9.68	7.94	0.69	1.04	3.34	0.0052	0.0604	5.56e-07	7.45e-05	NQO1	NAD(P)H dehydrogenase, quinone 1	1728
16799793	5.03	3.83	0.59	0.75	2.29	0.0104	0.2812	1.92e-06	0.0002	NUSAP1	nucleolar and spindle associated protein 1	51203	16799793	6.52	5.03	0.64	0.59	2.81	0.0002	0.0064	1.92e-06	0.0002	NUSAP1	nucleolar and spindle associated protein 1	51203
16975890	5.52	4.26	0.78	0.49	2.39	0.0033	0.2073	3.93e-05	0.0014	OCIAD2	OCIA domain containing 2	132299	16975890	6.94	5.52	0.9	0.78	2.68	0.0141	0.1125	3.93e-05	0.0014	OCIAD2	OCIA domain containing 2	132299
16824109	5.93	4.26	1.29	1.02	3.18	0.0152	0.3062	0.0005	0.0082	PLA2G10	phospholipase A2, group X	8399	16824109	7.18	5.93	1.2	1.29	2.39	0.0364	0.1991	0.0005	0.0082	PLA2G10	phospholipase A2, group X	8399
16793999	6.69	4.87	1.27	1.18	3.52	0.0059	0.24	0.0002	0.004	PLEK2	pleckstrin 2	26499	16793999	8	6.69	1.06	1.27	2.48	0.0349	0.194	0.0002	0.004	PLEK2	pleckstrin 2	26499
16946485	8.44	6.05	0.89	0.92	5.25	0.0007	0.1176	1.46e-06	0.0001	PLS1	plastin 1	5357	16946485	9.77	8.44	0.88	0.89	2.51	0.0018	0.0304	1.46e-06	0.0001	PLS1	plastin 1	5357
17112498	8.32	6.64	0.64	0.9	3.19	8.41e-05	0.052	2.17e-08	8.92e-06	POF1B	premature ovarian failure, 1B	79983	17112498	9.78	8.32	0.55	0.64	2.75	7.55e-05	0.0035	2.17e-08	8.92e-06	POF1B	premature ovarian failure, 1B	79983
17044692	5.34	4.22	0.57	0.45	2.17	0.0043	0.2232	5.78e-07	7.61e-05	PRR15	proline rich 15	222171	17044692	6.87	5.34	0.89	0.57	2.89	0.0001	0.0044	5.78e-07	7.61e-05	PRR15	proline rich 15	222171
16723318	6.74	5.32	0.87	0.89	2.68	0.0009	0.1336	2.32e-06	0.0002	PRRG4	proline rich Gla (G-carboxyglutamic acid) 4 (transmembrane)	79056	16723318	7.84	6.74	0.32	0.87	2.15	0.0022	0.0347	2.32e-06	0.0002	PRRG4	proline rich Gla (G-carboxyglutamic acid) 4 (transmembrane)	79056
16875656	5.26	4.25	0.33	0.33	2.01	0.0005	0.1064	9.88e-07	0.0001	PTPRH	protein tyrosine phosphatase, receptor type, H	5794	16875656	6.35	5.26	0.73	0.33	2.13	0.0015	0.0261	9.88e-07	0.0001	PTPRH	protein tyrosine phosphatase, receptor type, H	5794
17105939	6.72	5.52	0.78	0.72	2.3	0.0158	0.3095	0.0004	0.0072	RNF128	ring finger protein 128, E3 ubiquitin protein ligase	79589	17105939	8.11	6.72	1.28	0.78	2.61	0.0298	0.1761	0.0004	0.0072	RNF128	ring finger protein 128, E3 ubiquitin protein ligase	79589
16693482	6.77	5.55	0.89	0.48	2.34	0.0039	0.2172	3.15e-07	5.19e-05	S100A14	S100 calcium binding protein A14	57402	16693482	8.7	6.77	0.77	0.89	3.82	5.7e-05	0.0029	3.15e-07	5.19e-05	S100A14	S100 calcium binding protein A14	57402
17059771	7.76	6.05	0.98	1.17	3.27	0.0031	0.2011	4.02e-05	0.0014	SAMD9	sterile alpha motif domain containing 9	54809	17059771	8.94	7.76	0.71	0.98	2.27	0.0156	0.1196	4.02e-05	0.0014	SAMD9	sterile alpha motif domain containing 9	54809
17077341	4.56	2.97	1.26	0.31	3	0.0087	0.2636	4.84e-06	0.0003	SDR16C5	short chain dehydrogenase/reductase family 16C, member 5	195814	17077341	6.27	4.56	0.96	1.26	3.27	0.0006	0.0142	4.84e-06	0.0003	SDR16C5	short chain dehydrogenase/reductase family 16C, member 5	195814
16852812	5.27	2.51	0.92	0.97	6.78	8.84e-05	0.052	4.51e-09	3.15e-06	SERPINB5	serpin peptidase inhibitor, clade B (ovalbumin), member 5	5268	16852812	8	5.27	0.97	0.92	6.63	8.96e-06	0.0007	4.51e-09	3.15e-06	SERPINB5	serpin peptidase inhibitor, clade B (ovalbumin), member 5	5268
16677071	4.72	3.67	0.64	0.65	2.07	0.0064	0.2451	6.55e-06	0.0004	SERTAD4	SERTA domain containing 4	56256	16677071	5.76	4.72	0.84	0.64	2.07	0.0011	0.0213	6.55e-06	0.0004	SERTAD4	SERTA domain containing 4	56256
16661314	6.77	5.44	0.9	0.9	2.51	0.0038	0.2153	2.51e-05	0.001	SFN	stratifin	2810	16661314	8.2	6.77	0.76	0.9	2.69	0.0076	0.0765	2.51e-05	0.001	SFN	stratifin	2810
16988801	9.39	7.59	0.98	0.68	3.48	0.0002	0.0667	1.33e-06	0.0001	SLC12A2	solute carrier family 12 (sodium/potassium/chloride transporter), member 2	6558	16988801	10.7	9.39	0.71	0.98	2.48	0.008	0.0789	1.33e-06	0.0001	SLC12A2	solute carrier family 12 (sodium/potassium/chloride transporter), member 2	6558
17106398	7.63	3.12	1.93	1.85	22.8	0.0004	0.0902	3.93e-06	0.0003	SLC6A14	solute carrier family 6 (amino acid transporter), member 14	11254	17106398	9.29	7.63	0.75	1.93	3.17	0.0107	0.0945	3.93e-06	0.0003	SLC6A14	solute carrier family 6 (amino acid transporter), member 14	11254
16919547	8.91	6.13	0.85	1.8	6.86	0.0006	0.1105	5.81e-06	0.0004	SLPI	secretory leukocyte peptidase inhibitor	6590	16919547	10.71	8.91	1.03	0.85	3.49	0.0108	0.095	5.81e-06	0.0004	SLPI	secretory leukocyte peptidase inhibitor	6590
16764724	7.57	6.23	0.88	1.19	2.53	0.0075	0.2593	9.39e-05	0.0026	SMAGP	small cell adhesion glycoprotein	57228	16764724	8.8	7.57	0.53	0.88	2.35	0.0151	0.1175	9.39e-05	0.0026	SMAGP	small cell adhesion glycoprotein	57228
16849286	5.23	3.81	1.26	0.69	2.69	0.0145	0.3027	1.86e-05	0.0008	ST6GALNAC1	ST6 (alpha-N-acetyl-neuraminyl-2,3-beta-galactosyl-1,3)-N-acetylgalactosaminide alpha-2,6-sialyltransferase 1	55808	16849286	6.83	5.23	0.88	1.26	3.03	0.0015	0.0265	1.86e-05	0.0008	ST6GALNAC1	ST6 (alpha-N-acetyl-neuraminyl-2,3-beta-galactosyl-1,3)-N-acetylgalactosaminide alpha-2,6-sialyltransferase 1	55808
16686796	5	3.48	0.87	0.94	2.86	0.015	0.305	6.59e-06	0.0004	STIL	SCL/TAL1 interrupting locus	6491	16686796	6.76	5	0.69	0.87	3.38	0.0005	0.0127	6.59e-06	0.0004	STIL	SCL/TAL1 interrupting locus	6491
16816386	6.16	4.47	1.18	1.04	3.23	0.0116	0.2869	0.0004	0.0066	TMC7	transmembrane channel like 7	79905	16816386	7.32	6.16	1.17	1.18	2.23	0.036	0.1976	0.0004	0.0066	TMC7	transmembrane channel like 7	79905
16733421	6.86	4.53	0.84	1	5.04	0.0004	0.0931	6.37e-07	7.89e-05	TMEM45B	transmembrane protein 45B	120224	16733421	8.89	6.86	0.98	0.84	4.1	0.0011	0.0216	6.37e-07	7.89e-05	TMEM45B	transmembrane protein 45B	120224
16731773	7.17	3.93	1.21	1.34	9.47	0.0002	0.067	4.83e-06	0.0003	TMPRSS4	transmembrane protease, serine 4	56649	16731773	8.26	7.17	0.82	1.21	2.13	0.0336	0.19	4.83e-06	0.0003	TMPRSS4	transmembrane protease, serine 4	56649
16844312	6.41	3.73	0.73	1.42	6.41	0.0002	0.0667	8.23e-08	2.12e-05	TOP2A	topoisomerase (DNA) II alpha	7153	16844312	8.35	6.41	0.48	0.73	3.84	0.0002	0.0076	8.23e-08	2.12e-05	TOP2A	topoisomerase (DNA) II alpha	7153
16912379	5.12	2.97	0.89	1.11	4.42	0.0034	0.2077	3.2e-07	5.21e-05	TPX2	TPX2, microtubule-associated	22974	16912379	7.07	5.12	0.51	0.89	3.87	6.64e-05	0.0032	3.2e-07	5.21e-05	TPX2	TPX2, microtubule-associated	22974
16664218	7.78	4.54	0.98	1.43	9.47	2.97e-05	0.0331	5.1e-07	7.04e-05	TSPAN1	tetraspanin 1	10103	16664218	8.95	7.78	0.68	0.98	2.26	0.0156	0.1195	5.1e-07	7.04e-05	TSPAN1	tetraspanin 1	10103
16767513	7.99	5.6	0.6	1.18	5.22	0.0003	0.0882	1.26e-05	0.0006	TSPAN8	tetraspanin 8	7103	16767513	9.16	7.99	0.92	0.6	2.25	0.0472	0.2309	1.26e-05	0.0006	TSPAN8	tetraspanin 8	7103
16698023	5.73	4.55	0.99	0.92	2.26	0.0226	0.3443	1.79e-05	0.0008	UBE2T	ubiquitin conjugating enzyme E2T	29089	16698023	6.93	5.73	0.34	0.99	2.31	0.0009	0.0195	1.79e-05	0.0008	UBE2T	ubiquitin conjugating enzyme E2T	29089
16896196	5.08	3.56	0.96	0.51	2.88	0.0004	0.0925	1.19e-05	0.0006	XDH	xanthine dehydrogenase	7498	16896196	6.78	5.08	0.99	0.96	3.24	0.035	0.1943	1.19e-05	0.0006	XDH	xanthine dehydrogenase	7498
