# Supplementary material for: Establishment and Characterisation by Expression Microarray of Patient-Derived Xenograft Panel of Human Pancreatic Adenocarcinoma Patients
Source: Int J Mol Sci. 2020 Jan 31;21(3):962. doi: 10.3390/ijms21030962 (PMC7037178; doi:10.3390/ijms21030962)
Supplement: Supplementary file 1 [file ijms-21-00962-s001.zip › Supplementary Table S3.xlsx]

## Sheet: Sheet1
Gene & Mutation	Pt65 F1	Pt80 F1	Pt89 F1	Pt91 F1	Pt99 F1	Pt102 F1	Pt113 F1	Pt116 F1	Pt120 F1	Pt127 F1
IDH1_V178I_G532A	G	G	G	G	G	G	G	G	AG	G
KRAS_G12DAV_G35ACT	AG	AG	GT	AG	AG	GT	G	G	GT	G
KRAS_G13DAV_G38ACT	G	G	G	G	G	G	G	G	G	AG
MET_N375S_A1124G	A	A	A	A	AG	A	A	A	A	A
PHLPP2_L1016S_T3047C	T	T	CT	CT	T	CT	T	T	T	T
PIK3CA_H1047RL_A3140GT_F	AG	A	A	A	A	A	A	A	A	A
PIK3CA_H1047RL_A3140GT_R	GA	A	A	A	A	A	A	A	A	A
PIK3R1_M326I_G978ATC	G	G	G	A	AG	AG	AG	G	G	AG
